# Supplementary material for: Feasibility and Limitations of Vaccine Two-Dimensional Barcoding Using Mobile Devices
Source: PubMed Central journal article supplement (PMC4937181; doi:10.2196/jmir.5591), 2016-06-23

## MULTIMEDIA APPENDIX 2 – BARCODE SAMPLES

A full resolution version of this barcode sample can be accessed here: <http://bit.ly/1Hz8kw6>

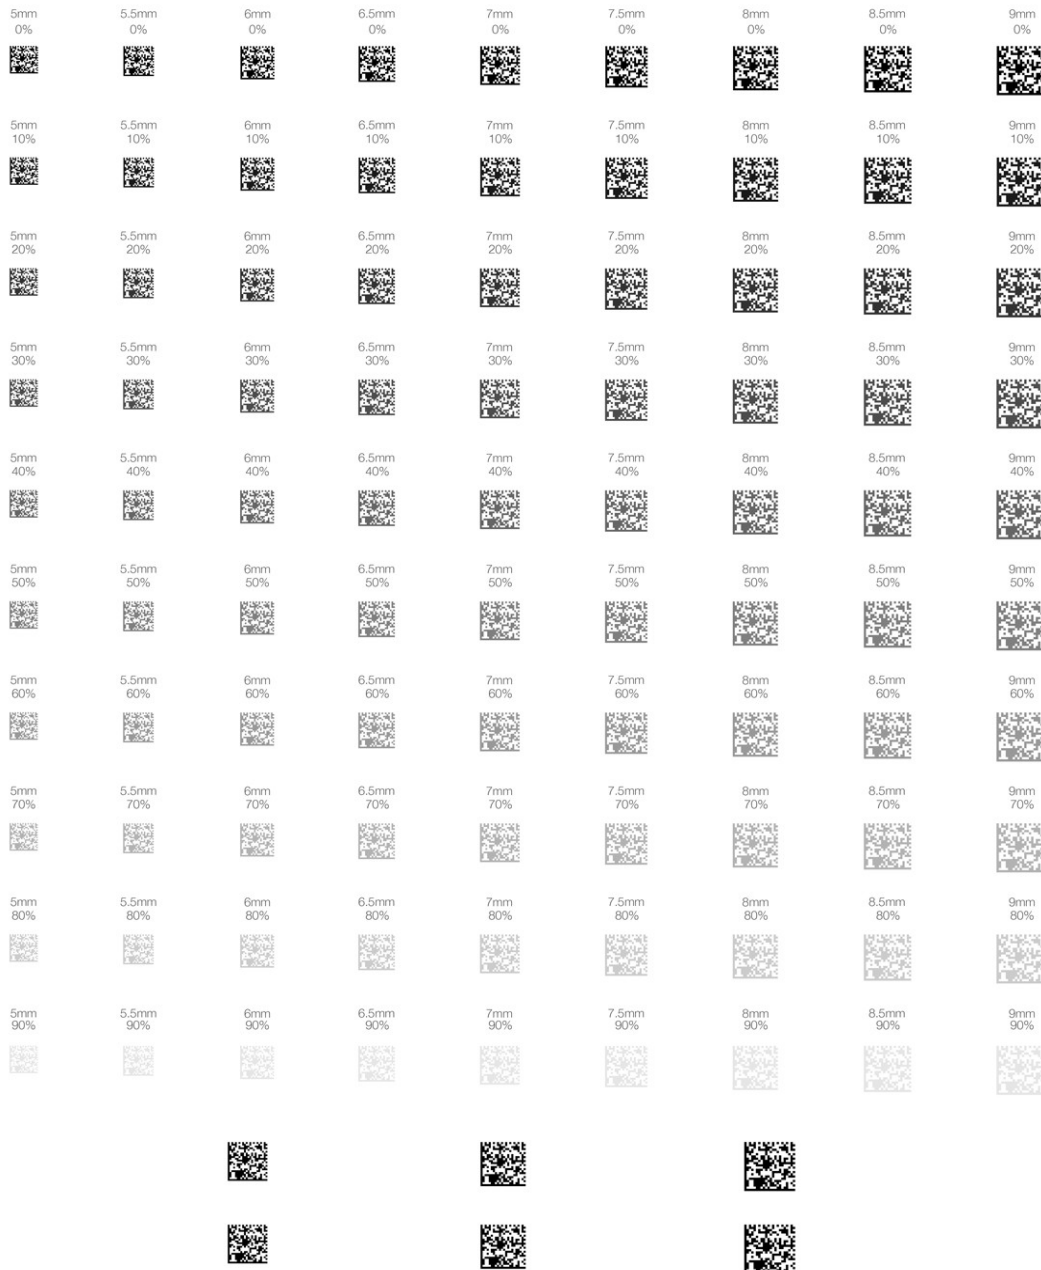

Supplement: jmir_v18i6e143_app1.pdf [file jmir_v18i6e143_app1.pdf]
