# Supplementary material for: Feasibility and Limitations of Vaccine Two-Dimensional Barcoding Using Mobile Devices
Source: PubMed Central journal article supplement (PMC4937181; doi:10.2196/jmir.5591), 2016-06-23

### MULTIMEDIA APPENDIX 3 – APP SCREENSHOTS

Screenshot 1 – Select trial screen in the developed barcode scanning experiment app.

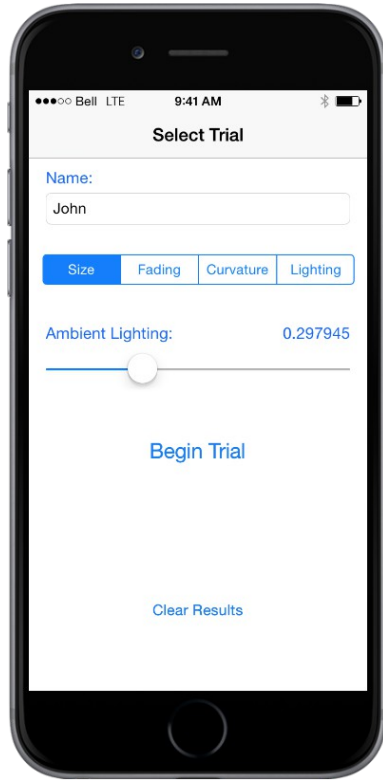

Screenshot 2 - Trial prompt screen in developed barcode scanning experiment app.

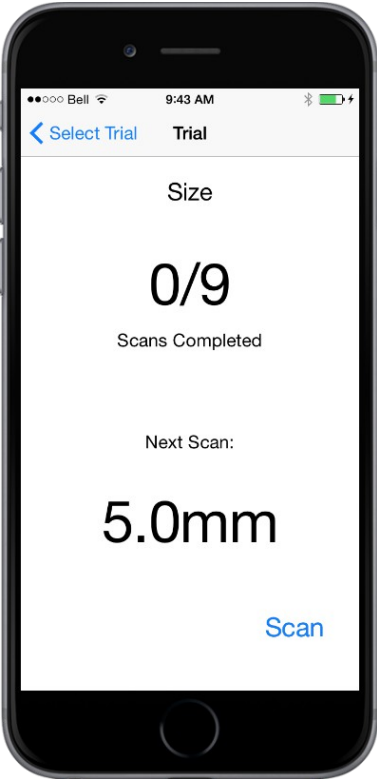

Supplement: jmir_v18i6e143_app2.pdf [file jmir_v18i6e143_app2.pdf]
