# Supplementary material for: Feasibility and Limitations of Vaccine Two-Dimensional Barcoding Using Mobile Devices
Source: PubMed Central journal article supplement (PMC4937181; doi:10.2196/jmir.5591), 2016-06-23
Supplement: jmir_v18i6e143_app3.pdf [file jmir_v18i6e143_app3.pdf]

**MULTIMEDIA APPENDIX 1 – DEVICE SPECIFICATIONS AND DATA CAPTURED PER SCAN**

Table 1 – Test device specifications

| <b>Device Name</b> | <b>OS</b> | <b>OS version</b> | <b>Megapixel Count</b>    | <b>Processor</b>                                            | <b>Processor Speed</b> |
|--------------------|-----------|-------------------|---------------------------|-------------------------------------------------------------|------------------------|
| iPhone 5           | iOS       | 8.2               | 8 MP, 3264 x 2448 pixels  | Dual-core 1.3 GHz Swift (ARM v7-based)                      | 1.3 GHz                |
| Nexus 5            | Android   | 5.1.0             | 8 MP, 3264 x 2448 pixels  | Qualcomm MSM8974 Snapdragon 800 Quad-core 2.3 GHz Krait 400 | 2.3 GHz                |
| Samsung Galaxy S4  | Android   | 4.4.1             | 13 MP, 4128 x 3096 pixels | Qualcomm Snapdragon 600 APQ8064T                            | 1.9 GHz                |
| Nexus 7            | Android   | 4.4.4             | 5 MP                      | Qualcomm Snapdragon S4 Pro APQ8064 1500 MHz                 | 1.5 GHz                |

Table 2 – Example of data captured by application at each scan

| <b>Trial ID</b> | <b>Trial Type</b> | <b>Sequence #</b> | <b>Scan Name</b> | <b>Scan Success</b> | <b>Data Success</b> | <b>Scan Time</b> | <b>Lighting</b> | <b>Scan Date</b>         | <b>Experimenter</b> | <b>Device</b> |
|-----------------|-------------------|-------------------|------------------|---------------------|---------------------|------------------|-----------------|--------------------------|---------------------|---------------|
| 1434558810      | 0                 | 0                 | 5.0mm            | 1                   | 1                   | 3.486176         | 512             | 2015-06-17T12:33:30.936Z | John                | iPhone5-1     |
